# Supplementary material for: Determinants and constraints of feather growth
Source: PubMed Central journal article supplement (PMC7182269; doi:10.1371/journal.pone.0231925), 2020-04-24
Supplement: pone.0231925.s001.pdf [file pone.0231925.s001.pdf]

**S1 Table. Measurements of the longest primary of 27 species**, ordered by body mass (taken from Cramp et al. 1977 – 1994). The column ‘source’ indicates where growth rates by length or growth duration were taken from. See Materials and Methods for details.

| Species                |                               | Body mass (g) | Longest primary | Feather mass (mg) | Feather length (mm) | Calamus diameter dorso-ventral (mm) | Calamus diameter distal-proximal (mm) | Calamus circumference (mm) | Calamus cross-sectional area (mm <sup>2</sup> ) | Duration of feather growth (d) | Sample size | Source                               |
|------------------------|-------------------------------|---------------|-----------------|-------------------|---------------------|-------------------------------------|---------------------------------------|----------------------------|-------------------------------------------------|--------------------------------|-------------|--------------------------------------|
| Willow Warbler         | <i>Phylloscopus trochilus</i> | 9.0           | P8              | 7.5               | 61                  | .800                                | .908                                  | 2.680                      | .5702                                           | 20.12                          | 4           | Bensch et al. 1991                   |
| Coal Tit               | <i>Parus ater</i>             | 9.5           | P7              | 5.5               | 57                  | .731                                | .775                                  | 2.370                      | .4451                                           | 18.92                          | 4           | Polo & Carrascal 1999                |
| Bluethroat             | <i>Luscinia svecica</i>       | 18.4          | P8              | 9.0               | 61                  | .795                                | .850                                  | 2.580                      | .5307                                           | 18.83                          | 1           | Bensch et al. 1991                   |
| Barn Swallow           | <i>Hirundo rustica</i>        | 18.7          | P9              | 34.0              | 109                 | 1.340                               | 1.395                                 | 4.300                      | 1.4681                                          | 27.25                          | 1           | Saino et al. 2012, Saino et al. 2013 |
| European white wagtail | <i>Motacilla alba</i>         | 21.6          | P8              | 16.0              | 78                  | 1.045                               | 1.245                                 | 3.600                      | 1.0218                                          | 17.33                          | 1           | Persson 1977                         |
| Common Wheatear        | <i>Oenanthe oenanthe</i>      | 22.9          | P8              | 19.0              | 82                  | 1.280                               | 1.315                                 | 4.080                      | 1.3220                                          | 27.33                          | 1           | Williamson 1957                      |
| Eurasian Tree Sparrow  | <i>Passer montanus</i>        | 23.0          | P7              | 10.5              | 60                  | .800                                | .893                                  | 2.660                      | .5608                                           | 19.96                          | 4           | own data                             |
| Eurasian Bullfinch     | <i>Pyrrhula pyrrhula</i>      | 26.0          | P6              | 17.0              | 80                  | 1.038                               | 1.225                                 | 3.560                      | .9982                                           | 29.63                          | 2           | Newton 1967                          |
| European Greenfinch    | <i>Carduelis chloris</i>      | 27.5          | P8              | 20.0              | 79                  | 1.200                               | 1.255                                 | 3.860                      | 1.1828                                          | 32.92                          | 1           | Newton 1967                          |
| House Sparrow          | <i>Passer domesticus</i>      | 30.0          | P8              | 15.0              | 67                  | .897                                | 1.032                                 | 3.030                      | .7273                                           | 17.05                          | 4           | Zeidler 1966                         |
| Eurasian Skylark       | <i>Alauda arvensis</i>        | 34.5          | P8              | 25.0              | 88                  | 1.195                               | 1.420                                 | 4.120                      | 1.3327                                          | 18.72                          | 1           | own data                             |
| White-winged Snowfinch | <i>Montifringilla nivalis</i> | 37.0          | P8              | 38.0              | 104                 | 1.300                               | 1.570                                 | 4.520                      | 1.6030                                          | 25.37                          | 1           | Winkler & Winkler 1985               |
| Common Starling        | <i>Sturnus vulgaris</i>       | 80.0          | P9              | 65.0              | 109                 | 1.570                               | 1.750                                 | 5.220                      | 2.1579                                          | 27.25                          | 1           | Dawson 2003                          |
| Common Quail           | <i>Coturnix coturnix</i>      | 110.0         | P9              | 36.0              | 90                  | 1.380                               | 1.240                                 | 4.120                      | 1.3440                                          | 23.94                          | 1           | Baader 1982                          |
| Eurasian Kestrel femal | <i>Falco tinnunculus</i>      | 180.0         | P8              | 270.2             | 211                 | 2.339                               | 3.184                                 | 8.730                      | 5.8550                                          | 46.14                          | 4           | Piechocki 1956                       |
| Alpine Chough          | <i>Pyrrhocorax graculus</i>   | 210.0         | P7              | 296.0             | 232                 | 2.525                               | 3.495                                 | 9.520                      | 6.9310                                          | 37.42                          | 1           | Winkler et al. 1988                  |
| Magpie                 | <i>Pica pica</i>              | 210.0         | P6              | 149.0             | 169                 | 1.960                               | 2.805                                 | 7.540                      | 4.3180                                          | 51.21                          | 1           | Seel 1976                            |
| Long-Eared Owl         | <i>Asio otus</i>              | 290.0         | P8              | 393.0             | 251                 | 3.260                               | 3.300                                 | 10.300                     | 8.4493                                          | 39.84                          | 1           | Wijnandts 1984                       |
| Common                 | <i>Perdix perdix</i>          | 380.0         | P7              | 132.0             | 135                 | 2.630                               | 2.615                                 | 8.240                      | 5.4015                                          | 27.22                          | 1           | Baader 1982                          |

|                 |                            |         |    |        |     |       |       |        |         |       |   |                       |
|-----------------|----------------------------|---------|----|--------|-----|-------|-------|--------|---------|-------|---|-----------------------|
| Partridge       |                            |         |    |        |     |       |       |        |         |       |   |                       |
| Rook            | <i>Corvus frugilegus</i>   | 470.0   | P7 | 553.0  | 272 | 3.005 | 4.045 | 11.130 | 9.5467  | 61.82 | 1 | Seel 1976             |
| Carrion Crow    | <i>Corvus corone</i>       | 540.0   | P7 | 623.0  | 283 | 3.560 | 4.315 | 12.400 | 12.0648 | 57.76 | 1 | own data              |
| Mallard         | <i>Anas platyrhynchos</i>  | 1016.0  | P9 | 434.0  | 204 | 3.500 | 3.420 | 10.870 | 9.4012  | 37.09 | 2 | Panek & Majewski 1990 |
| Common pheasant | <i>Phasianus colchicus</i> | 1150.0  | P7 | 444.0  | 205 | 3.395 | 4.015 | 11.660 | 10.7057 | 32.03 | 1 | Sutter 1971           |
| Common Raven    | <i>Corvus corax</i>        | 1200.0  | P7 | 1602.0 | 379 | 4.680 | 5.868 | 16.620 | 21.5669 | 61.13 | 2 | own data              |
| White Stork     | <i>Ciconia ciconia</i>     | 3448.0  | P8 | 2594.0 | 453 | 6.715 | 7.094 | 21.700 | 37.4134 | 52.07 | 4 | Sutter 1984           |
| Golden Eagle    | <i>Aquila chrysaetos</i>   | 5194.0  | P6 | 5432.0 | 571 | 7.300 | 9.300 | 26.170 | 53.3206 | 63.44 | 1 | own data              |
| Mute Swan       | <i>Cygnus olor</i>         | 10750.0 | P8 | 4217.0 | 455 | 7.790 | 7.850 | 24.570 | 48.0282 | 65.94 | 1 | Mathiasson 1973       |

## References

- BAADER, E. (1982): Vergleichende Untersuchungen über Ausbildung und Mauser des Jugendgefieders bei Wachtel, Rebhuhn und weiteren Hühnervögeln. PhD thesis, University of Basel.
- BENSCH, S., D. HASSELQUIST, A. HEDENSTRÖM & U. OTTOSSON (1991): Rapid moult among Palaearctic passerines in West Africa - an adaptation to the oncoming dry season? *Ibis* 133: 47–52.
- CRAMP, S. *et al.* (1977-1994): Handbook of the Birds of Europe, the Middle East and North Africa. The Birds of the Western Palearctic, Vol. 1-9. Oxford Univ. Press, Oxford.
- DAWSON, A. (2003): A detailed analysis of primary feather moult in the Common Starling *Sturnus vulgaris* - new feather mass increases at a constant rate. *Ibis* 145: E69-E76.
- MATHIASSEN, S. (1973): A moulting population of non-breeding Mute Swans with special reference to flight-feather moult, feeding ecology and habitat selection. *Wildfowl* 24: 43–53.
- NEWTON, I. (1967): Feather growth and moult in some captive finches. *Bird Study* 14: 10–24.

- PANEK, M. & P. MAJEWSKI (1990): Remex growth and body mass of mallards during wing molt. *Auk* 107: 255–259.
- PERSSON, C. (1977): The early stages of the postnuptial moult in the White Wagtail *Motacilla alba*. *Ornis Scandinavica* 8: 97–99.
- PIECHOCKI, R. (1956): Über die Mauser eines gekäfigten Turmfalken (*Falco tinnunculus*). *J. Ornithol.* 97: 301–309.
- POLO, V. & L. M. CARRASCAL (1999): Ptilochronology and fluctuating asymmetry in tail and wing feathers in Coal Tits *Parus ater*. *Ardeola* 46: 195–204.
- SAINO, N., M. ROMANO, M. CAPRIOLI, R. AMBROSINI, D. RUBOLINI, C. SCANDOLARA & A. ROMANO (2012): A ptilochronological study of carry-over effects of conditions during wintering on breeding performance in the barn swallow *Hirundo rustica*. *J. Avian Biol.* 43: 513–524.
- SAINO, N., M. ROMANO, M. CAPRIOLI, R. LARDELLI, P. MICHELONI, C. SCANDOLARA, D. RUBOLINI & M. FASOLA (2013): Molt, feather growth rate and body condition of male and female Barn Swallows. *J. Ornithol.* 154: 537–547.
- SEEL, D. C. (1976): Molt in five species of corvidae in Britain. *Ibis* 118: 491–536.
- SUTTER, E. (1971): Ausbildung und Mauser des Flügelgefieders beim juvenilen Jagdfasan *Phasianus colchicus*. *Ornithol. Beob.* 68: 179–222.
- SUTTER, E. (1984): Ontogeny of the wing moult pattern in the White Stork *Ciconia ciconia*. *Proceedings V Pan-African Ornithological Congress* 543–551.
- WIJNANDTS, H. (1984): Ecological energetics of the Long-eared Owl *Asio otus*. *Ardea* 72: 1–92.
- WILLIAMSON, K. (1957): The annual post-nuptial molt in the wheatear (*Oenanthe oenanthe*). *Bird Banding* 28: 129–135.
- WINKLER, R., W. D. DAUNICHT & L. G. UNDERHILL (1988): Die Grossgefiedermauser von Alpendohle *Pyrrhocorax graculus* und Alpenkrähe *Pyrrhocorax pyrrhocorax*. *Ornithol. Beob.* 85: 245–259.
- WINKLER, R. & A. WINKLER (1985): Zur Jugendmauser handaufgezogener Schneefinken *Montifringilla nivalis*. *Ornithol. Beob.* 82: 55–66.
- ZEIDLER, K. (1966): Untersuchungen über Flügelbefiederung und Mauser des Haussperlings (*Passer domesticus* L.). *J. Ornithol.* 107: 113–153.
