# Supplementary material for: Determinants and constraints of feather growth
Source: PubMed Central journal article supplement (PMC7182269; doi:10.1371/journal.pone.0231925), 2020-04-24
Supplement: pone.0231925.s002.pdf [file pone.0231925.s002.pdf]

**S2 Table.** Reduced major axis (RMA) and phylogenetic RMA (PhyloRMA) regression of various parameters of the longest primary of 27 species (see S1 Table). Intercept, slope and R<sup>2</sup> values are provided for both RMA and PhyloRMA while 95% confidence intervals (95% CI) of both intercept and slope are shown only for RMA. Slope is the scaling exponent of the allometric log-log-relationship. H0 is the slope (scaling exponent) against which the observed slope has been tested for difference: \* = significantly different (P < 0.001), ° = P > 0.09, ° P > 0.3.

| Model                                                          | H0    | PhyloRMA  |         |                | RMA       |                 |         |               |                |
|----------------------------------------------------------------|-------|-----------|---------|----------------|-----------|-----------------|---------|---------------|----------------|
|                                                                |       | Intercept | Slope   | R <sup>2</sup> | Intercept | 95% CI          | Slope   | 95% CI        | R <sup>2</sup> |
| log(growth-rate by mass) ~ log(calamus cross-sectional area)   | 1     | 2.898     | 1.168*  | 0.946          | 2.901     | 2.866 , 2.935   | 1.142*  | 1.078 , 1.211 | 0.981          |
| log(growth-rate by mass) ~ log(calamus circumference)          | 2     | 1.609     | 2.336*  | 0.946          | 1.645     | 1.534 , 1.749   | 2.279*  | 2.151 , 2.415 | 0.981          |
| log(growth-rate by length) ~ log(calamus cross-sectional area) | 1     | 0.463     | 0.311*  | 0.584          | 0.523     | 0.491 , 0.549   | 0.236*  | 0.185 , 0.297 | 0.755          |
| log(growth-rate by length) ~ log(calamus circumference)        | 1     | 0.121     | 0.621*  | 0.583          | 0.264     | 0.163 , 0.346   | 0.471*  | 0.369 , 0.594 | 0.754          |
| log(calamus cross-sectional area) ~ log(feather-length)        | 2     | -4.007    | 2.111 ° | 0.967          | -3.895    | -4.176 , -3.631 | 2.053 ° | 1.931 , 2.183 | 0.978          |
| log(calamus circumference) ~ log(feather-length)               | 1     | -1.451    | 1.055 ° | 0.969          | -1.401    | -1.537 , -1.272 | 1.029 ° | 0.969 , 1.092 | 0.979          |
| log(growth-rate by mass) ~ log(feather-length)                 | 3     | -1.781    | 2.464*  | 0.946          | -1.545    | -1.985 , -1.139 | 2.344*  | 2.155 , 2.548 | 0.961          |
| log(growth-rate by length) ~ log(feather-length)               | 0.5   | -0.781    | 0.655*  | 0.598          | -0.392    | -0.673 , -0.163 | 0.482 ° | 0.376 , 0.613 | 0.744          |
| log(feather mass) ~ log(feather-length)                        | 3     | -4.236    | 2.912 ° | 0.985          | -4.222    | -4.535 , -3.924 | 2.895 ° | 2.756 , 3.041 | 0.986          |
| log(feather mass) ~ log(body mass)                             | 1     | -0.422    | 1.095 ° | 0.935          | -0.176    | -0.407 , 0.032  | 1.023 ° | 0.926 , 1.131 | 0.944          |
| log(feather-length) ~ log(body mass)                           | 0.333 | 1.311     | 0.376 ° | 0.885          | 1.395     | 1.274 , 1.499   | 0.355 ° | 0.306 , 0.411 | 0.887          |
| log(growth-rate by length) ~ log(body mass)                    | 1     | 0.078     | 0.246*  | 0.522          | 0.279     | 0.171 , 0.364   | 0.172*  | 0.132 , 0.223 | 0.718          |
