# Supplementary material for: Determinants and constraints of feather growth
Source: PubMed Central journal article supplement (PMC7182269; doi:10.1371/journal.pone.0231925), 2020-04-24
Supplement: pone.0231925.s003.pdf [file pone.0231925.s003.pdf]

**S3 Table.** Reduced major axis regressions of various parameters of the remiges (primaries and secondaries of Golden Eagles. Intercept and slope with their 95% confidence intervals (95% CI), as well as R<sup>2</sup> are shown. H0 is the slope (scaling exponent) against which the observed slope has been tested for difference: \* = significantly different (P < 0.001), \*\* = P > 0.3..

| Model                                                          | H0  | Intercept | 95% CI          | Slope    | 95% CI        | R <sup>2</sup> |
|----------------------------------------------------------------|-----|-----------|-----------------|----------|---------------|----------------|
| log(growth-rate by mass) ~ log(calamus cross-sectional area)   | 1   | 0.253     | 0.141 , 0.356   | 0.971 ** | 0.898 , 1.049 | 0.941          |
| log(growth-rate by mass) ~ log(calamus circumference)          | 2   | -0.791    | -0.988 , -0.608 | 1.922 ** | 1.777 , 2.078 | 0.940          |
| log(growth-rate by length) ~ log(calamus cross-sectional area) | 1   | -0.590    | -0.726 , -0.481 | 0.316*   | 0.24 , 0.411  | 0.572          |
| log(growth-rate by length) ~ log(calamus circumference)        | 1   | -0.932    | -1.171 , -0.741 | 0.627*   | 0.476 , 0.816 | 0.573          |
| log(calamus cross-sectional area)~ log(feather-length)         | 2   | -0.879    | -1.104 , -0.673 | 1.492*   | 1.358 , 1.637 | 0.916          |
| log(calamus circumference) ~ log(feather-length)               | 1   | 0.099     | -0.015 , 0.204  | 0.753*   | 0.686 , 0.827 | 0.915          |
| log(growth-rate by mass) ~ log(feather-length)                 | 3   | -0.600    | -0.811 , -0.404 | 1.447*   | 1.321 , 1.584 | 0.920          |
| log(growth-rate by length) ~ log(feather-length)               | 0.5 | -0.853    | -1.081 , -0.671 | 0.462 ** | 0.343 , 0.609 | 0.544          |
| log(feather mass) ~ log(feather-length)                        | 3   | -2.847    | -2.984 , -2.715 | 2.050*   | 1.965 , 2.139 | 0.981          |
