# Supplementary material for: Determinants and constraints of feather growth
Source: PubMed Central journal article supplement (PMC7182269; doi:10.1371/journal.pone.0231925), 2020-04-24
Supplement: pone.0231925.s004.pdf [file pone.0231925.s004.pdf]

**S4 Table.** Linear mixed effects models applied to the parameters of Golden Eagle remiges. Intercept,  $\beta$ -coefficients for the two independent variables (with their significance; \*  $P < 0.0001$ ;  $^{\sim}$   $P > 0.67$ ), marginal  $R^2$  (without the random effect individual) and conditional  $R^2$  (with the random effect individual) is shown. Massiveness = mass of feather material per mm feather-length.

| Model                                                                           | Intercept | $\beta$ (slope)          | $R^2$    |             |
|---------------------------------------------------------------------------------|-----------|--------------------------|----------|-------------|
|                                                                                 |           |                          | Marginal | Conditional |
| log(growth-rate by mass) ~ log(calamus cross-sectional area) + (feather type)   | 0.301     | 0.942*; -0.007 $^{\sim}$ | 0.935    | 0.949       |
| log(growth-rate by mass) ~ log(calamus circumference) + (feather type)          | -0.695    | 1.852*; -0.008 $^{\sim}$ | 0.935    | 0.947       |
| log(growth-rate by length) ~ log(calamus cross-sectional area) + (feather type) | -0.676    | 0.357*; 0.042*           | 0.632    | 0.650       |
| log(growth-rate by length) ~ log(calamus circumference) + (feather type)        | -1.050    | 0.699*; 0.042*           | 0.630    | 0.643       |
| log(growth-rate by length) ~ log(feather-length) + (feather type)               | -1.192    | 0.649*; 0.073*           | 0.673    | 0.673       |
| log(feather mass) ~ log(feather-length) + log(massiveness)                      | -0.001    | 0.999*; 0.999*           | 0.999    | 0.999       |
| log(feather mass) ~ log(feather-length) + (feather type)                        | -2.561    | 1.879* ; -0.034*         | 0.974    | 0.988       |
