# Supplementary material for: Determinants and constraints of feather growth
Source: PubMed Central journal article supplement (PMC7182269; doi:10.1371/journal.pone.0231925), 2020-04-24
Supplement: pone.0231925.s005.pdf [file pone.0231925.s005.pdf]

**S5 Table.** Reduced major axis regressions of various parameters of the primaries of 6 passerine species. Intercept and slope with their 95% confidence intervals (95% CI), as well as R<sup>2</sup> are shown. H0 is the slope (scaling exponent) against which the observed slope has been tested for difference: \* = significantly different (P < 0.001), ~ P > 0.67.

| Model                                                             | H0  | Intercept | 95% CI          | Slope   | 95% CI        | R <sup>2</sup> |
|-------------------------------------------------------------------|-----|-----------|-----------------|---------|---------------|----------------|
| log(growth-rate by mass) ~ log(calamus cross-sectional area)      | 1   | -0.116    | -0.129 , -0.104 | 1.046 ~ | 0.929 , 1.181 | 0.842          |
| log(growth-rate by mass) ~ log(calamus circumference)             | 2   | -1.276    | -1.437 , -1.136 | 2.092 ~ | 1.86 , 2.357  | 0.845          |
| log(growth-rate by length) ~ log(cross-sectional area of calamus) | 1   | 0.471     | 0.443 , 0.487   | 0.229*  | 0.057 , 0.487 | 0.096          |
| log(growth-rate by length) ~ log(calamus circumference)           | 1   | 0.213     | -0.099 , 0.421  | 0.463*  | 0.122 , 0.978 | 0.099          |
| log(cross-sectional area of calamus) ~ log(feather-length)        | 2   | -3.721    | -3.961 , -3.496 | 1.983 ~ | 1.866 , 2.107 | 0.954          |
| log(calamus circumference) ~ log(feather-length)                  | 1   | -1.306    | -1.416 , -1.202 | 0.992 ~ | 0.938 , 1.049 | 0.960          |
| log(growth-rate by mass) ~ log(feather-length)                    | 3   | -4.011    | -4.606 , -3.499 | 2.075*  | 1.811 , 2.384 | 0.801          |
| log(growth-rate by length) ~ log(feather-length)                  | 0.5 | -0.329    | -1.245 , 0.312  | 0.426*  | 0.094 , 0.901 | 0.093          |
| log(feather mass) ~ log(feather-length)                           | 3   | -3.721    | -3.981 , -3.474 | 2.669*  | 2.541 , 2.804 | 0.969          |
