# Supplementary material for: Determinants and constraints of feather growth
Source: PubMed Central journal article supplement (PMC7182269; doi:10.1371/journal.pone.0231925), 2020-04-24
Supplement: pone.0231925.s006.pdf [file pone.0231925.s006.pdf]

**S6 Table.** Linear mixed effects models applied to the parameters of the primaries of 6 passerine species. Intercept,  $\beta$ -coefficients for the two or three independent variables (with their significance; \*  $P < 0.0001$ ;  $^{\circ}$   $P > 0.67$ ), marginal  $R^2$  (without the random effect individual) and conditional  $R^2$  (with the random effect individual) is shown. Massiveness = mass of feather material per mm feather-length.

| Model                                                                                                            | Intercept | $\beta$ (slope)           | $R^2$    |             |
|------------------------------------------------------------------------------------------------------------------|-----------|---------------------------|----------|-------------|
|                                                                                                                  |           |                           | Marginal | Conditional |
| log(growth-rate by mass) ~ log(calamus cross-sectional area) + (wingtip primary) <sup>1</sup>                    | -0.087    | 0.964* ; -0.067*          | 0.833    | 0.988       |
| log(growth-rate by mass) ~ log(calamus circumference) + (wingtip primary) <sup>1</sup>                           | -1.159    | 1.929* ; -0.061*          | 0.833    | 0.989       |
| log(growth-rate by length) ~ log(calamus cross-sectional area) + (wingtip primary) <sup>1</sup>                  | 0.494     | 0.224* ; -0.072*          | 0.302    | 0.958       |
| log(growth-rate by length) ~ log(calamus circumference) + (wingtip primary) <sup>1</sup>                         | 0.240     | 0.456* ; -0.071*          | 0.308    | 0.961       |
| log(calamus cross-sectional area) ~ log(feather-length) + (wingtip primary) <sup>1</sup>                         | -2.841    | 1.518* ; 0.044*           | 0.872    | 0.978       |
| log(calamus cross-sectional area) ~ log(feather-length) + log(massiveness) + (wingtip primary) <sup>1</sup>      | -0.561    | 0.557* ; 0.827* ; 0.013   | 0.979    | 0.991       |
| log(growth-rate by mass) ~ log(feather-length) + log(massiveness) + (wingtip primary) + (1 species) <sup>1</sup> | -0.685*   | 0.575* ; 0.826* ; -0.057* | 0.879    | 0.995       |
| log(growth-rate by length) ~ log(feather-length) + (wingtip primary) + (1 species)*                              | -0.214*   | 0.377* ; -0.063*          | 0.249    | 0.963       |
| logFeathermass ~ logFeatherlength + logMassperlength                                                             | -0.001    | 0.999* ; 0.999*           | 0.999    | 0.999       |
| logFeathermass ~ logFeatherlength + Wingtip                                                                      | -2.721    | 2.143* ; 0.037*           | 0.908    | 0.994       |

<sup>1</sup> Species as random intercept effect is highly significant at  $p < 0.001$ .
